# Supplementary material
Source: MDPI journal article supplement (https://www.mdpi.com/2072-4292/12/13/2104)

## **SUPPORTING INFORMATION**

for

# **Estimation of gross primary productivity (GPP) phenology of a short-rotation plantation using remotely- sensed indices derived from Sentinel-2 images.**

**Maral Maleki <sup>1</sup>, Nicola Arriga <sup>2</sup>, José Miguel Barrios <sup>3</sup>, Sebastian Wieneke <sup>1</sup>, Qiang Liu <sup>1</sup>, Josep  
Peñuelas <sup>4,5</sup>, Ivan A. Janssens <sup>1</sup>, Manuela Balzarolo <sup>1,4,5,\*</sup>**

**Figure S1.** Linear correlation between gross primary productivity (GPP) and the vegetation indices. (a) MCARI – Modified chlorophyll absorption ratio index; (b) PSSR – Pigment specific simple ratio; (c) SIPI – Structure insensitive pigment index; (d) gNDVI – Green normalized difference vegetation index. The blue, green and red dots represent 2016, 2017 and 2018, respectively. The lines represent the linear fitted models. The shaded areas represent the 95% confidence intervals for the slopes of the fitted lines.  $R^2$ , coefficient of determination; RMSE, root mean square error; \*,  $0.01 < p \leq 0.05$ ; \*\*,  $p \leq 0.01$ .

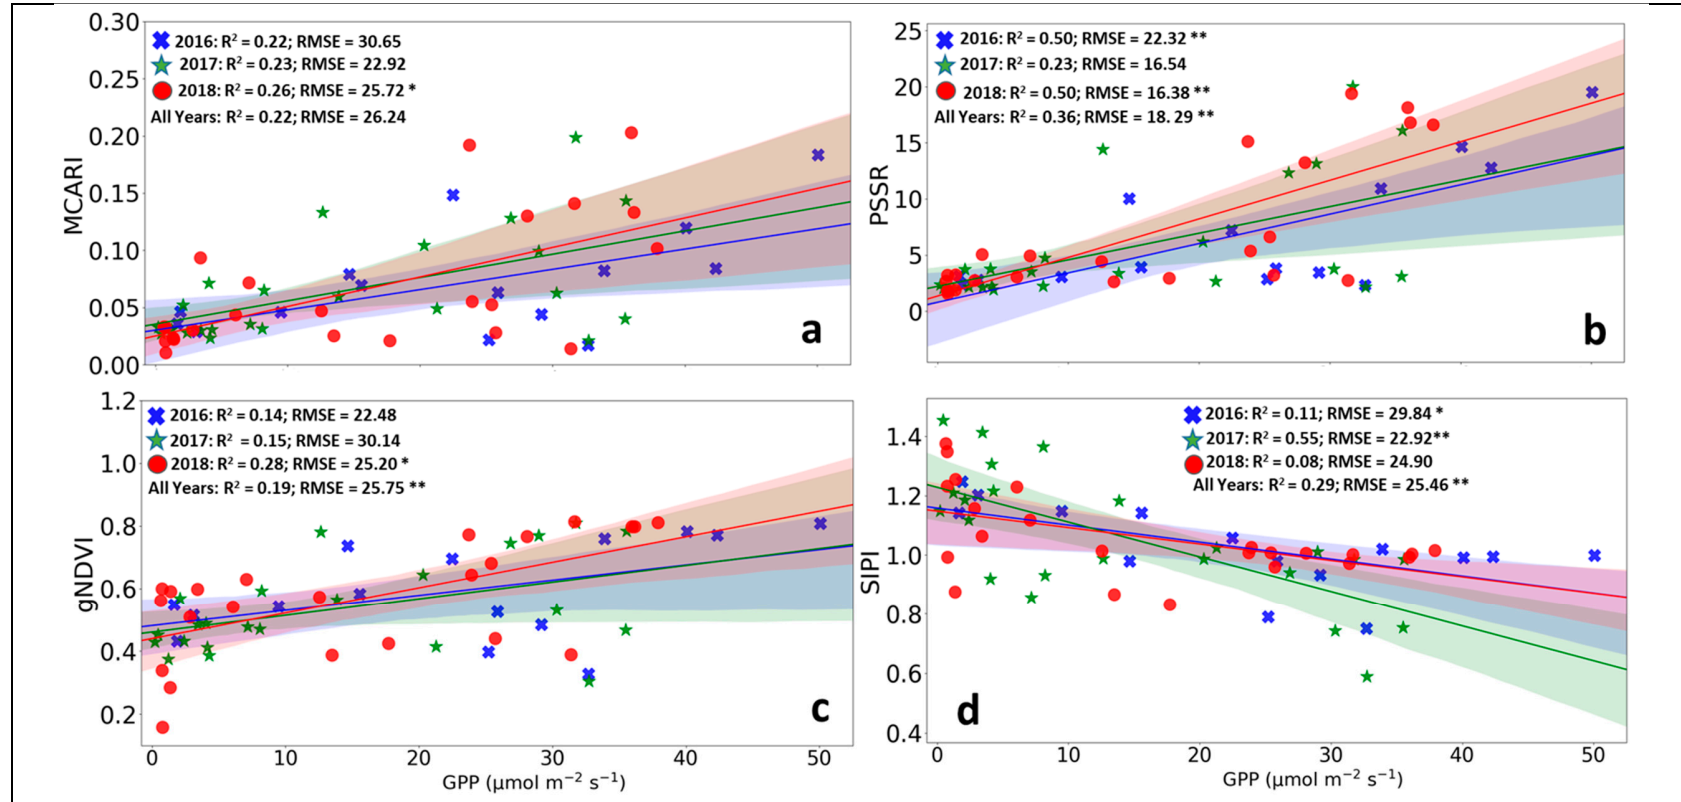

Supplement: s1 [file s1]
